# Supplementary material for: HIV dynamics linked to memory CD4+ T cell homeostasis
Source: PubMed Central journal article supplement (PMC5648138; doi:10.1371/journal.pone.0186101), 2017-10-19
Supplement: pone.0186101.s005.pdf [file pone.0186101.s005.pdf]

**S4 Table. Leave-one-out Cross-validation.**

**Interquartile ranges determined using a Leave-one-out Cross-validation. All rates are per day.**

| $k_{A0}$    | $\gamma$                                       | $\mu_L$                                        | $\mu_C$                                        | $\varphi$        | $\varphi_1$                                    | $\beta_0$                                      |
|-------------|------------------------------------------------|------------------------------------------------|------------------------------------------------|------------------|------------------------------------------------|------------------------------------------------|
| 0.059-0.088 | 0.997-0.999                                    | 0.033-0.052                                    | $2.6 \times 10^{-5}$ -<br>$1.6 \times 10^{-4}$ | 0.29-0.45        | 0.83-0.84                                      | $8.4 \times 10^{-5}$ -<br>$2.1 \times 10^{-4}$ |
| $\beta_1$   | $\lambda_{A1}$                                 | $\mu_R$                                        | $\mu_A$                                        | $\mu_{RI}$       | $\rho_R$                                       | $\rho_A$                                       |
| 0.53-0.76   | $2.0 \times 10^{-9}$ -<br>$9.2 \times 10^{-9}$ | $7.8 \times 10^{-4}$ -<br>$9.6 \times 10^{-4}$ | $4.3 \times 10^{-3}$ -<br>$5.3 \times 10^{-3}$ | 0.18-0.20        | $5.6 \times 10^{-3}$ -<br>$1.0 \times 10^{-2}$ | 0.017-0.042                                    |
| $\nu_R$     | $N$                                            | $N_R$                                          | $u$                                            | $u_i$            | $vscale$                                       | $vscale_{inf}$                                 |
| 0.017-0.027 | 894,052 -<br>988,996                           | 98,338 -<br>99,139                             | 0.9994 -<br>0.9998                             | 0.995 -<br>0.998 | 0.010-0.017                                    | 0.062-0.13                                     |
